# Supplementary material for: Temozolomide Increases Heat Shock Proteins in Extracellular Vesicles Released from Glioblastoma Cells
Source: Research Square preprint supplement (doi:10.21203/rs.3.rs-1606132/v2), 2022-06-14
Supplement: Supplementary file 1 [file fdc0dd1d8af1c927351cd636.xlsx]

## Sheet: Sayfa1
		U87-MG						LN229
Genes	Significant	P value	Fold Change (200 μM TMZ )			Genes	Significant	P value	Fold Change (200 μM TMZ )
CDC2	No	0.00463099	1.592			CDC2	No	0.0214375	3.055
CDC20	No	0.000263405	1.644			CDC20	Yes	0.000314711	1.991	Primer Dimer
CDC25A	No	0.0089814	24.23			CDC25A	No	0.0968968	1.646
CDK2	No	0.00431398	4.327			CDK2	No	0.174568	1.439
CDK4	No	0.162987	1507			CDK4	No	0.973811	0.9945
DCR	No	0.00448402	3.366			DCR	No	0.707585	1.109
DR4	No	0.00448402	3.366			DR4	No	0.920593	0.9877
DR5	N/A	N/A	N/A			DR5	No	0.00435413	1.985
ERCC1	No	0.418979	1.518			ERCC1	No	0.378993	1.131
ERCC3	No	0.920692	0.9906			ERCC3	No	0.973811	1.035
FADD	N/A	N/A	N/A			FADD	No	0.807322	0.9828
Fas	No	0.669739	1.392			Fas	No	0.0245373	3.398
GADD45A	Yes	0.00116146	12.91	Primer Dimer		GADD45A	No	0.0711011	1.588
GPX1	No	0.0874733	6.77			GPX1	No	0.00993797	1.917
GRB2	Yes	0.000802471	4.768	Primer Dimer		GRB2	Yes	3.57885e-05	1.435
GSTP1	N/A	N/A	N/A			GSTP1	No	0.00846572	1.168
HRK	No	0.704335	0.9445			HRK	No	0.00474697	2.376
LIG4	N/A	N/A	N/A			LIG4	No	0.00474697	2.376
MCL1	No	0.0761104	0.6821			MCL1	No	0.0307938	1.631
MDM2	N/A	N/A	N/A			MDM2	Yes	2.83093e-05	7.643
MUTYH	N/A	N/A	N/A			MUTYH	No	0.492924	0.7617
NFKB1/p50	No	0.000171402	0.4621			NFKB1/p50	No	0.0862579	4.93
NOS2	No	0.000547406	2.683			NOS2	No	0.41244	1.577
Noxa	No	0.147925	3.498			Noxa	No	0.00504373	2.852
NOX1	No	0.177876	6.579			NOX1	No	0.267613	1.737
NOX4	Yes	0.00113067	5.367	Primer Dimer		NOX4	No	0.0368911	2.146
OGG1	No	0.00021244	2.123			OGG1	No	0.115201	1.496
P53	No	0.177808	1.406			P53	No	0.459005	1.148
PRDX1	No	0.177802	2.138			PRDX1	No	0.608707	1.199
Puma	No	0.142677	0.5682			Puma	No	0.0712574	4.568
RAD51	Yes	0.000271633	6.228			RAD51	No	0.154011	1.927
RAD52	No	0.0309488	0.8128			RAD52	No	0.0134124	1.98
RIPK2	No	0.177263	1.981			RIPK2	No	0.192605	1.545
SIRT2	No	0.00448402	3.366			SIRT2	N/A	N/A	N/A
SOD1	No	0.028713	12.7			SOD1	No	0.0280372	1.687
TNFRSF11B	No	0.00699971	2.69			TNFRSF11B	Yes	9.15482e-07	0.6483	Primer Dimer
XPA	No	0.00108335	2.832			XPA	No	0.0774237	1.796
XRCC5	N/A	N/A	N/A			XRCC5	No	0.0581806	1.106
Nek2	No	0.00102098	1.76			Nek2	Yes	0.000305845	2.62
Akt1	No	0.0718583	1.265			Akt1	No	0.0216216	1.953
FAsL	No	0.522136	1.604			FAsL	No	0.205919	5.655
Akt2-F	No	0.0018625	2.532			Akt2-F	No	2.64957e-05	1.909
APAF1	N/A	N/A	N/A			APAF1	No	0.154858	1.927
ATG7	N/A	N/A	N/A			ATG7	No	0.199723	1.152
ATM	N/A	N/A	N/A			ATM	Yes	3.57657e-05	1.212
ATR	No	0.162725	3.021			ATR	No	0.499701	1.086
AURKA	No	0.12207	14.67			AURKA	Yes	4.33459e-05	1.526	Primer Dimer
Bad	No	0.886121	1.103			Bad	No	0.245401	4.769
BAG1	N/A	N/A	N/A			BAG1	No	0.716731	0.922
BAG3	No	0.00245137	5.376			BAG3	No	0.0433133	1.824
BAG4	No	0.00730771	3.51			BAG4	No	0.635424	0.899
Bak1	No	0.429683	2.162			Bak1	No	0.159632	2.441
Bax	No	0.115607	7.109			Bax	No	0.083205	2.813
Bcl2	N/A	N/A	N/A			Bcl2	No	0.385915	1.546
BCL2A1	No	0.00730771	3.51			BCL2A1	No	0.333887	0.775
BCL10	N/A	N/A	N/A			BCL10	No	0.102238	1.546
BCL2L2	No	0.258762	1.202			BCL2L2	No	0.738079	1.223
BCL2L10	N/A	N/A	N/A			BCL2L10	No	0.572727	1.037
BCLAF1	Yes	0.00137389	4.177	Primer Dimer		BCLAF1	No	0.0332444	1.259
Bcl-xL	No	0.285891	2.127			Bcl-xL	No	0.0919957	1.789
BECN1	N/A	N/A	N/A			BECN1	No	0.217025	2.083
BFAR	No	0.0567943	1.11			BFAR	No	0.0144778	0.742
BIRC2	No	0.695051	1.348			BIRC2	No	0.00763915	1.379
BIRC3	No	0.00730771	3.51			BIRC3	N/A	N/A	N/A
BIRC4	No	0.120925	6.852			BIRC4	No	0.0176592	2.257
BIRC5	No	0.580264	0.731			BIRC5	No	0.0583884	1.579
BIRC6	No	0.0382676	2.199			BIRC6	No	0.581982	1.116
BIRC8	No	0.00730771	3.51			BIRC8	N/A	N/A	N/A
Bid	No	0.695051	1.348			Bid	No	0.00424561	2.245
Bik	No	0.695051	1.348			Bik	No	0.55855	1.336
Bim	No	0.429683	2.162			Bim	No	0.0701659	1.171
BMF	No	0.80237	0.9408			BMF	No	0.260892	3.258
BMI1	N/A	N/A	N/A			BMI1	No	0.243198	0.8969
BNIP1	No	0.144245	1.623			BNIP1	No	0.0284679	1.517
BNIP2	No	0.429683	2.162			BNIP2	No	0.0175731	0.2953
BNIP3	No	0.322877	1.599			BNIP3	No	0.0203125	1.525
BNIP3L	No	0.620484	1.488			BNIP3L	No	0.739017	1.102
CASP1	No	0.201835	1.519			CASP1	No	0.0543957	2.389
CASP2	N/A	N/A	N/A			CASP2	No	0.0196554	0.9092
CASP3	No	0.163019	4.683			CASP3	No	0.44861	0.7859
CASP4	No	0.301159	1.656			CASP4	No	0.676328	0.8947
CASP5	No	0.00730771	3.51			CASP5	No	0.178466	0.5005
CASP6	No	0.108276	0.999			CASP6	No	0.724785	1.241
CASP7	N/A	N/A	N/A			CASP7	No	0.146258	1.567
CASP8	No	0.17227	3.796			CASP8	No	0.098578	1.813
CASP9	N/A	N/A	N/A			CASP9	No	0.000297509	1.576
CASP10	No	0.00730771	3.51			CASP10	No	0.0366858	2.196
CASP14	No	0.00730771	3.51			BIRC8	N/A	N/A	N/A
CAT	No	0.0660061	2.06			CAT	No	0.459782	1.172
